# Supplementary material for: Application of trilobal capillary-channeled polymer (C-CP) fibers for reversed phase liquid chromatography and ESI-MS for the determination of proteins in different biological matrices
Source: Royal Society of Chemistry journal article supplement (doi:10.1039/c9ay00864k), 2019-01-01
Supplement: c9ay00864k1.pdf [file c9ay00864k1.pdf]

Electronic Supplementary Material

for

**Application of trilobal capillary-channeled  
polymer (C-CP) fibers for reversed phase liquid  
chromatography and ESI-MS for the determination of  
proteins in different biological matrices**

Katherine B. Youmans, Lei Wang and R. Kenneth Marcus\*

Department of Chemistry

102 Biosystems Research Complex

Clemson University

Clemson, SC 29634

- Author to whom correspondence should be addressed

Submitted for publication in Analytical Methods

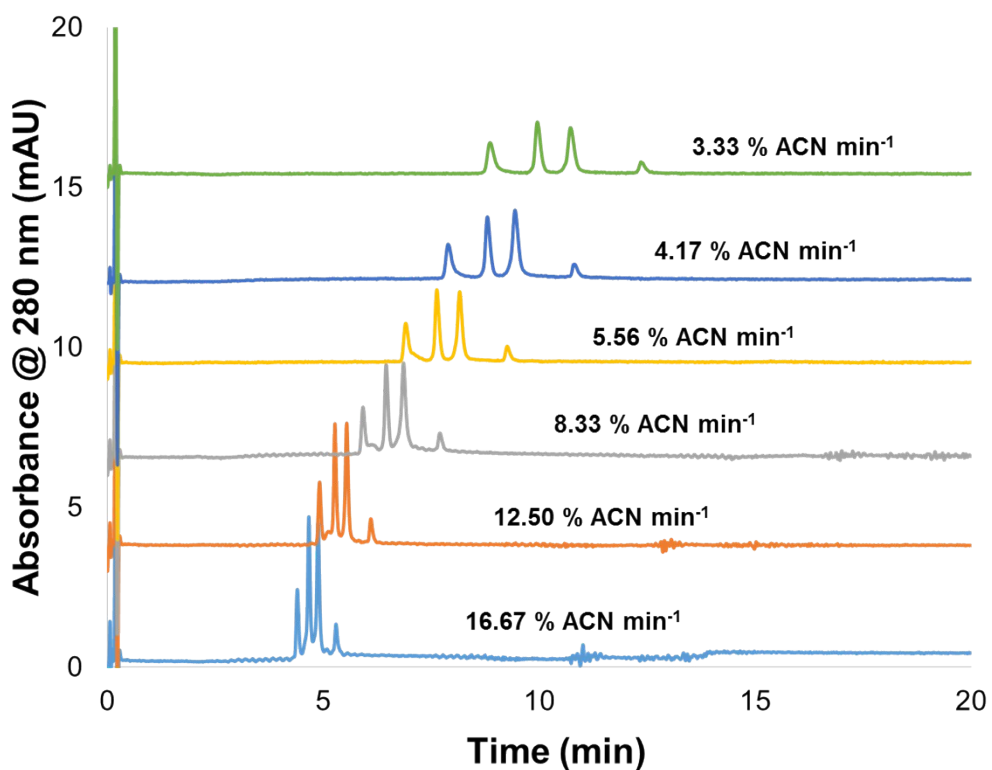

ESI Fig.1. Effects of gradient rate on the chromatographic performance of PPY C-CP fiber column. Analytes: ribonuclease A, cytochrome c, lysozyme and myoglobin (20  $\mu\text{g mL}^{-1}$  each, 5  $\mu\text{L}$  injection), mobile phase: 100%  $\text{H}_2\text{O}$  + 1.5% FA to 100% ACN + 1.5% FA, flow rate: 0.4  $\text{mL min}^{-1}$ , 280 nm absorbance detection.
